# Supplementary material for: Low temperature growth of fully covered single-layer graphene using a CoCu catalyst
Source: Royal Society of Chemistry journal article supplement (doi:10.1039/c7nr02553j), 2017-01-01
Supplement: c7nr02553j1.pdf [file c7nr02553j1.pdf]

## Low temperature growth of fully covered single-layer graphene using CoCu catalyst

Hisashi Sugime<sup>\*a,b</sup>, Lorenzo D'Arsié,<sup>b</sup> Santiago Esconjauregui,<sup>b</sup> Guofang Zhong,<sup>b</sup> Xingyi Wu,<sup>b</sup> Eugen Hildebrandt,<sup>b</sup> Hikmet Sezen,<sup>c</sup> Matteo Amati,<sup>c</sup> Luca Gregoratti,<sup>c</sup> Robert S. Weatherup<sup>b</sup> and John Robertson<sup>b</sup>

*\*E-mail: sugime@aoni.waseda.jp*

*<sup>a</sup>Waseda Institute for Advanced Study, Waseda University, Tokyo 169-8050, Japan.*

*<sup>b</sup>Department of Engineering, University of Cambridge, Cambridge CB3 0FA, United Kingdom*

*<sup>c</sup>Elettra-Sincrotrone Trieste S.C.p.A., AREA Science Park, S.S. 14 km 163.5, 34149, Trieste, Italy*

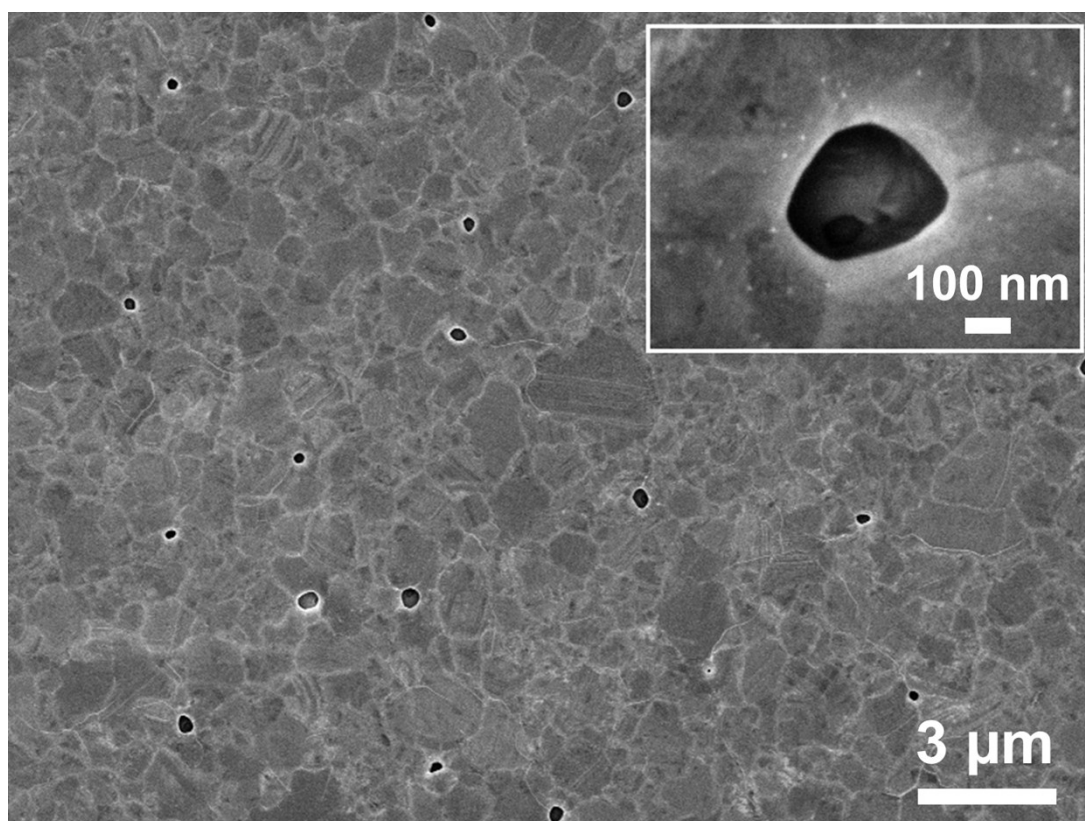

Fig. S1 A SEM image of the as-grown graphene on the Cu(6 nm)/Co(500 nm)/SiO<sub>2</sub>(90 nm)/Si sample (without Ti adhesion layer below Co). The growth process is carried out at 750 °C for 3 min with CH<sub>4</sub> (60 sccm) and Ar (240 sccm) at 50 mbar (standard condition).

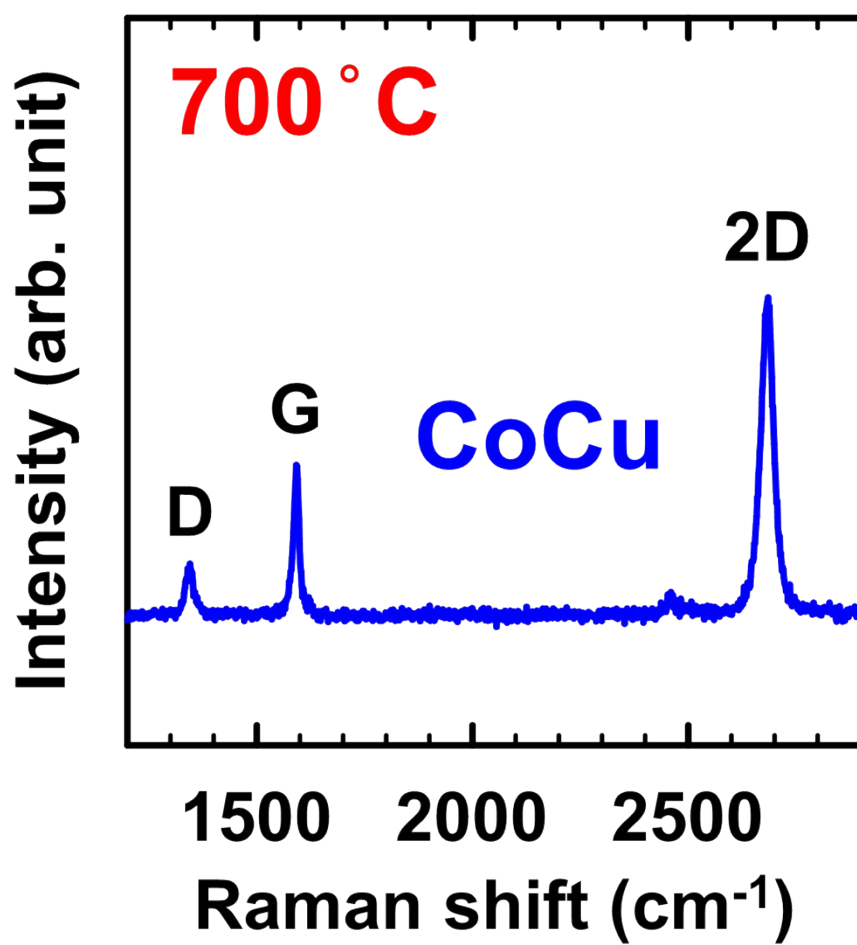

Fig. S2 Typical Raman spectra of the single layer graphene grown at 700 °C (50 °C lower than the standard condition) using CoCu [Cu: 6 nm on Co: 500 nm] catalyst.

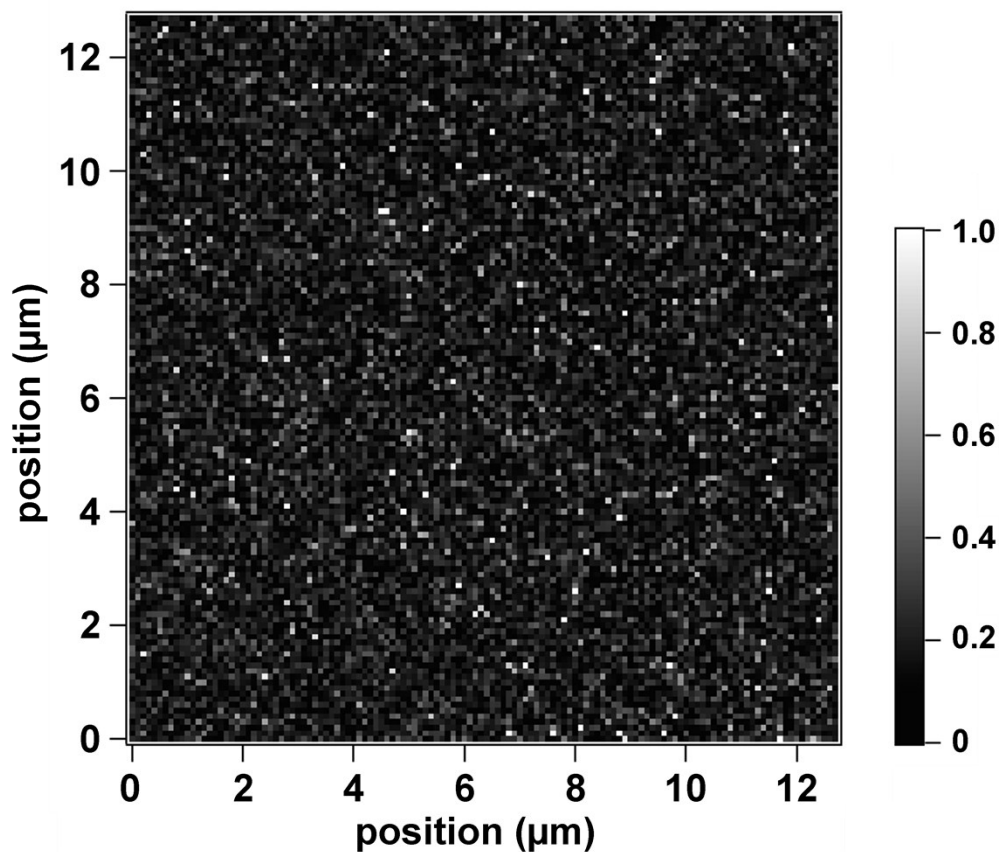

Fig. S3 The chemical map of Cu obtained by spatially resolving the XPS signal (100 nm resolution). The sample temperature is 550 °C. The intensity is the accumulation of counts of the Cu  $2p_{3/2}$  peak in the range 931 to 934 eV, scaled to the brightest point. The spectra were first background corrected to remove the influence of the morphology. The single pixels are noisy as the spectra were not intense. No large scale inhomogeneities can be observed.
